# Supplementary material for: PI3Kγ Activates Integrin α4 and Promotes Immune Suppressive Myeloid Cell Polarization during Tumor Progression
Source: Oxford University Press journal article supplement (doi:10.1158/2326-6066.cir-17-0143), 2017-09-29
Supplement: 23266066cir170143-sup-180904_2_supp_4280272_hwjl1h.docx [file 23266066cir170143-sup-180904_2_supp_4280272_hwjl1h.docx]

**Supplementary Figure 1: PI3Kγ and integrin α4 inhibitors suppress tumor progression.**

Upper: time course of LLC tumor growth in cIgG versus PS2 (anti-) treated animals (n=10). Lower: time course of LLC tumor growth in Vehicle versus TG100-115 treated animals (n=10).
